# Supplementary material for: The Spring to Coast Approach in Small-Scale Catchments and Adjacent Coastal Zone
Source: MDPI journal article supplement (doi:10.3390/w16020259), 2024-01-11
Supplement: s1 [file s1]

## Supplementary Material

**Table S1.** Physicochemical water quality parameters and pollutants in surface water (mean values  $\pm$  standard deviations, min and max values) along Laspias river for the monitoring period (June 2021- January 2023).

| Stations                     |               | 1                    | 2                   | 3                   | 4A                   | 4B                   | 5                    | 6                    |
|------------------------------|---------------|----------------------|---------------------|---------------------|----------------------|----------------------|----------------------|----------------------|
| T (°C)                       | mean $\pm$ SD | 16.87 $\pm$ 4.54     | 16.80 $\pm$ 4.74    | 16.50 $\pm$ 3.78    | 17.86 $\pm$ 4.39     | 16.44 $\pm$ 4.46     | 18.83 $\pm$ 3.79     | 13.93 $\pm$ 3.52     |
|                              | min           | 11.00                | 11.90               | 11.50               | 12.40                | 11.40                | 14.00                | 9.50                 |
|                              | max           | 23.10                | 22.90               | 21.10               | 23.30                | 21.60                | 23.10                | 18.30                |
| pH                           | mean $\pm$ SD | 7.76 $\pm$ 0.14      | 7.78 $\pm$ 0.13     | 7.74 $\pm$ 0.24     | 7.61 $\pm$ 0.32      | 7.76 $\pm$ 0.13      | 7.91 $\pm$ 0.37      | 7.91 $\pm$ 0.08      |
|                              | min           | 7.52                 | 7.61                | 7.30                | 6.89                 | 7.63                 | 7.46                 | 7.83                 |
|                              | max           | 7.90                 | 8.01                | 8.04                | 7.89                 | 7.91                 | 8.58                 | 8.01                 |
| EC<br>( $\mu$ S/cm)          | mean $\pm$ SD | 1213.69 $\pm$ 949.68 | 786.67 $\pm$ 357.17 | 670.54 $\pm$ 364.26 | 1309.29 $\pm$ 142.43 | 1223.14 $\pm$ 340.53 | 1104.00 $\pm$ 213.82 | 1296.23 $\pm$ 900.60 |
|                              | min           | 412.30               | 468.70              | 250.30              | 1063.00              | 673.00               | 777.00               | 286.00               |
|                              | max           | 3140.00              | 1392.00             | 1335.00             | 1522.00              | 1574.00              | 1335.00              | 2970.00              |
| DO<br>(mg/L)                 | mean $\pm$ SD | 3.94 $\pm$ 1.79      | 3.74 $\pm$ 1.16     | 3.71 $\pm$ 1.71     | 1.97 $\pm$ 1.38      | 3.67 $\pm$ 2.11      | 2.15 $\pm$ 2.79      | 5.70 $\pm$ 2.08      |
|                              | min           | 1.55                 | 2.06                | 1.25                | 0.59                 | 1.47                 | 0.22                 | 1.61                 |
|                              | max           | 6.21                 | 5.64                | 6.99                | 4.13                 | 7.85                 | 7.85                 | 7.93                 |
| COD <sub>tot</sub><br>(mg/L) | mean $\pm$ SD | 44.57 $\pm$ 56.10    | 37.03 $\pm$ 24.22   | 32.00 $\pm$ 16.11   | 104.46 $\pm$ 50.79   | 48.46 $\pm$ 27.86    | 341.06 $\pm$ 452.32  | 87.09 $\pm$ 97.34    |
|                              | min           | 6.40                 | 12.80               | 12.80               | 32.00                | 12.80                | 121.60               | 6.40                 |
|                              | max           | 166.40               | 80.00               | 57.60               | 185.60               | 96.00                | 1357.00              | 296.00               |
| BOD <sub>5</sub><br>(mg/L)   | mean $\pm$ SD | 8.09 $\pm$ 7.02      | 6.41 $\pm$ 6.42     | 5.13 $\pm$ 4.46     | 26.59 $\pm$ 16.83    | 6.47 $\pm$ 3.56      | 85.71 $\pm$ 61.47    | 7.61 $\pm$ 7.98      |
|                              | min           | 1.00                 | 1.00                | 0.00                | 8.00                 | 1.00                 | 25.00                | 2.00                 |
|                              | max           | 22.00                | 20.00               | 11.90               | 58.80                | 10.00                | 200.00               | 20.00                |
| SS<br>(mg/L)                 | mean $\pm$ SD | 10.33 $\pm$ 5.05     | 17.80 $\pm$ 17.37   | 21.39 $\pm$ 29.46   | 55.45 $\pm$ 29.02    | 12.97 $\pm$ 14.11    | 105.79 $\pm$ 89.86   | 10.11 $\pm$ 8.02     |
|                              | min           | 3.00                 | 6.00                | 6.00                | 19.00                | 0.00                 | 43.00                | 2.00                 |
|                              | max           | 14.00                | 56.00               | 88.00               | 99.00                | 41.00                | 302.00               | 26.00                |
| Chl-a<br>( $\mu$ g/L)        | mean $\pm$ SD | 34.92 $\pm$ 76.80    | 18.14 $\pm$ 39.95   | 22.22 $\pm$ 54.00   | 35.09 $\pm$ 80.04    | 99.15 $\pm$ 246.09   | 84.65 $\pm$ 200.14   | 48.05 $\pm$ 121.70   |
|                              | min           | 0.00                 | 0.00                | 0.00                | 0.00                 | 0.00                 | 1.90                 | 0.00                 |
|                              | max           | 208.90               | 108.60              | 144.60              | 216.40               | 656.70               | 538.30               | 324.00               |
| NO <sub>2</sub> -N<br>(mg/L) | mean $\pm$ SD | 0.20 $\pm$ 0.07      | 0.16 $\pm$ 0.06     | 0.13 $\pm$ 0.07     | 0.15 $\pm$ 0.12      | 0.36 $\pm$ 0.23      | 0.37 $\pm$ 0.34      | 0.23 $\pm$ 0.21      |
|                              | min           | 0.13                 | 0.11                | 0.07                | 0.03                 | 0.06                 | 0.03                 | 0.04                 |

|                                  |           |        |         |        |        |        |        |        |        |        |        |        |        |        |         |
|----------------------------------|-----------|--------|---------|--------|--------|--------|--------|--------|--------|--------|--------|--------|--------|--------|---------|
|                                  | max       | 0.30   |         | 0.29   |        | 0.29   |        | 0.37   |        | 0.66   |        | 0.78   |        | 0.64   |         |
| NO <sub>3</sub> <sup>-</sup> -N  | mean ± SD | 1.61   | ±0.94   | 1.34   | ±1.03  | 1.58   | ±1.65  | 0.25   | ±0.40  | 2.15   | ±1.55  | 1.49   | ±2.27  | 3.17   | ±2.80   |
| (mg/L)                           | min       | 0.57   |         | 0.40   |        | 0.42   |        | 0.00   |        | 0.25   |        | 0.04   |        | 0.30   |         |
|                                  | max       | 3.35   |         | 3.50   |        | 4.53   |        | 1.12   |        | 4.77   |        | 6.22   |        | 8.14   |         |
| NH <sub>4</sub> <sup>+</sup> -N  | mean ± SD | 6.66   | ±4.98   | 5.76   | ±1.76  | 6.78   | ±2.28  | 30.78  | ±10.03 | 5.87   | ±3.81  | 28.94  | ±8.25  | 9.87   | ±16.60  |
| (mg/L)                           | min       | 3.10   |         | 3.27   |        | 3.42   |        | 14.89  |        | 1.19   |        | 18.59  |        | 0.00   |         |
|                                  | max       | 17.26  |         | 9.00   |        | 9.97   |        | 42.53  |        | 11.26  |        | 39.18  |        | 46.38  |         |
| TN                               | mean ± SD | 18.75  | ±16.17  | 15.40  | ±5.52  | 16.64  | ±6.46  | 64.14  | ±23.64 | 17.61  | ±9.87  | 73.95  | ±29.05 | 27.40  | ±39.56  |
| (mg/L)                           | min       | 8.05   |         | 9.05   |        | 7.49   |        | 28.97  |        | 7.13   |        | 35.69  |        | 3.92   |         |
|                                  | max       | 54.87  |         | 25.16  |        | 26.66  |        | 93.06  |        | 35.66  |        | 117.10 |        | 112.90 |         |
| PO <sub>4</sub> <sup>3-</sup> -P | mean ± SD | 1.42   | ±1.08   | 1.32   | ±0.84  | 0.93   | ±0.69  | 4.21   | ±4.00  | 1.42   | ±1.11  | 2.43   | ±1.20  | 0.19   | ±0.20   |
| (mg/L)                           | min       | 0.29   |         | 0.46   |        | 0.21   |        | 1.29   |        | 0.50   |        | 1.70   |        | 0.02   |         |
|                                  | max       | 3.57   |         | 2.77   |        | 2.23   |        | 12.61  |        | 3.48   |        | 5.11   |        | 0.56   |         |
| F <sup>-</sup>                   | mean ± SD | 0.33   | ±0.10   | 0.32   | ±0.16  | 0.29   | ±0.11  | 0.22   | ±0.11  | 0.38   | ±0.13  | 0.23   | ±0.13  | 0.42   | ±0.17   |
| (mg/L)                           | min       | 0.21   |         | 0.14   |        | 0.15   |        | 0.09   |        | 0.22   |        | 0.12   |        | 0.18   |         |
|                                  | max       | 0.49   |         | 0.61   |        | 0.42   |        | 0.35   |        | 0.57   |        | 0.42   |        | 0.62   |         |
| Cl <sup>-</sup>                  | mean ± SD | 206.10 | ±272.26 | 95.98  | ±53.14 | 73.92  | ±43.85 | 148.15 | ±51.31 | 114.21 | ±51.50 | 120.55 | ±39.57 | 137.76 | ±128.49 |
| (mg/L)                           | min       | 43.33  |         | 46.02  |        | 25.35  |        | 87.38  |        | 46.51  |        | 75.97  |        | 7.99   |         |
|                                  | max       | 800.02 |         | 175.15 |        | 157.96 |        | 226.39 |        | 175.57 |        | 163.50 |        | 389.46 |         |
| Br <sup>-</sup>                  | mean ± SD | 0.62   | ±1.00   | 0.21   | ±0.23  | 0.18   | ±0.25  | 0.38   | ±0.47  | 0.49   | ±0.31  | 0.24   | ±0.39  | 0.50   | ±0.40   |
| (mg/L)                           | min       | 0.02   |         | 0.00   |        | 0.00   |        | 0.09   |        | 0.19   |        | 0.07   |        | 0.08   |         |
|                                  | max       | 2.83   |         | 0.66   |        | 0.67   |        | 1.42   |        | 1.08   |        | 1.14   |        | 1.25   |         |
| SO <sub>4</sub> <sup>2-</sup>    | mean ± SD | 58.61  | ±50.99  | 41.97  | ±33.64 | 38.46  | ±32.45 | 45.74  | ±5.16  | 121.71 | ±51.51 | 42.29  | ±8.82  | 86.87  | ±61.97  |
| (mg/L)                           | min       | 16.52  |         | 14.77  |        | 11.22  |        | 40.84  |        | 55.39  |        | 23.05  |        | 12.64  |         |
|                                  | max       | 143.11 |         | 113.96 |        | 106.61 |        | 56.32  |        | 176.40 |        | 48.06  |        | 155.37 |         |
| Li <sup>+</sup>                  | mean ± SD | 0.06   | ±0.05   | 0.07   | ±0.04  | 0.07   | ±0.04  | 0.06   | ±0.05  | 0.07   | ±0.04  | 0.07   | ±0.04  | 0.06   | ±0.05   |
| (mg/L)                           | min       | 0.00   |         | 0.00   |        | 0.00   |        | 0.00   |        | 0.00   |        | 0.00   |        | 0.00   |         |
|                                  | max       | 0.12   |         | 0.11   |        | 0.11   |        | 0.11   |        | 0.11   |        | 0.11   |        | 0.11   |         |
| Na <sup>+</sup>                  | mean ± SD | 138.16 | ±162.35 | 72.65  | ±41.31 | 58.18  | ±34.67 | 109.77 | ±32.61 | 91.44  | ±36.82 | 93.80  | ±27.88 | 117.95 | ±94.48  |
| (mg/L)                           | min       | 35.97  |         | 33.84  |        | 21.21  |        | 67.19  |        | 42.14  |        | 58.86  |        | 9.22   |         |
|                                  | max       | 483.80 |         | 136.87 |        | 124.43 |        | 149.85 |        | 126.93 |        | 130.79 |        | 287.12 |         |
| K <sup>+</sup>                   | mean ± SD | 14.15  | ±14.16  | 7.65   | ±3.74  | 7.47   | ±3.40  | 21.69  | ±4.87  | 11.73  | ±5.53  | 19.64  | ±3.55  | 37.88  | ±43.35  |
| (mg/L)                           | min       | 4.65   |         | 4.54   |        | 3.84   |        | 11.72  |        | 4.05   |        | 12.57  |        | 2.38   |         |
|                                  | max       | 41.78  |         | 14.15  |        | 12.08  |        | 26.18  |        | 19.39  |        | 22.88  |        | 128.06 |         |

|                            |           |       |        |       |        |       |        |       |        |        |        |       |        |        |        |
|----------------------------|-----------|-------|--------|-------|--------|-------|--------|-------|--------|--------|--------|-------|--------|--------|--------|
| Mg <sup>2+</sup><br>(mg/L) | mean ± SD | 16.39 | ±17.94 | 10.08 | ±6.66  | 9.09  | ±6.70  | 10.34 | ±4.01  | 26.09  | ±10.62 | 9.05  | ±2.76  | 23.41  | ±15.86 |
|                            | min       | 2.89  |        | 2.33  |        | 1.50  |        | 4.64  |        | 13.15  |        | 4.89  |        | 3.47   |        |
|                            | max       | 53.68 |        | 23.29 |        | 22.44 |        | 16.46 |        | 39.46  |        | 12.34 |        | 44.73  |        |
| Ca <sup>2+</sup><br>(mg/L) | mean ± SD | 47.02 | ±15.48 | 53.40 | ±21.02 | 51.70 | ±22.03 | 62.95 | ±13.52 | 86.34  | ±24.99 | 61.98 | ±13.18 | 63.08  | ±33.39 |
|                            | min       | 32.39 |        | 34.54 |        | 32.86 |        | 39.40 |        | 61.40  |        | 39.40 |        | 32.48  |        |
|                            | max       | 79.60 |        | 94.45 |        | 95.10 |        | 75.69 |        | 126.33 |        | 76.30 |        | 132.52 |        |

**Table S2a.** Physicochemical water quality parameters and pollutants in surface water (mean values  $\pm$  standard deviations, min and max values) along Lissos river for the monitoring period (June 2021- January 2023).

| Stations                            |               | 1       | 2             | 3      | 4            | 5      | 6            | 7      |             |        |             |        |             |        |              |
|-------------------------------------|---------------|---------|---------------|--------|--------------|--------|--------------|--------|-------------|--------|-------------|--------|-------------|--------|--------------|
| T (°C)                              | mean $\pm$ SD | 17.83   | $\pm 6.14$    | 17.03  | $\pm 6.05$   | 15.92  | $\pm 6.65$   | 15.74  | $\pm 6.34$  | 17.31  | $\pm 7.33$  | 16.66  | $\pm 8.38$  | 13.79  | $\pm 4.03$   |
|                                     | min           | 9.90    |               | 7.80   |              | 8.90   |              | 7.60   |             | 7.80   |             | 5.30   |             | 6.50   |              |
|                                     | max           | 25.00   |               | 23.90  |              | 23.50  |              | 21.70  |             | 23.80  |             | 27.20  |             | 18.30  |              |
| pH                                  | mean $\pm$ SD | 8.12    | $\pm 0.31$    | 8.71   | $\pm 0.90$   | 8.39   | $\pm 0.15$   | 8.31   | $\pm 0.20$  | 8.79   | $\pm 0.46$  | 8.54   | $\pm 0.35$  | 8.41   | $\pm 0.08$   |
|                                     | min           | 7.47    |               | 7.92   |              | 8.24   |              | 8.12   |             | 8.32   |             | 8.04   |             | 8.30   |              |
|                                     | max           | 8.45    |               | 10.13  |              | 8.67   |              | 8.73   |             | 9.60   |             | 9.02   |             | 8.51   |              |
| EC<br>( $\mu\text{S}/\text{cm}$ )   | mean $\pm$ SD | 1126.59 | $\pm 1234.27$ | 598.89 | $\pm 162.15$ | 474.30 | $\pm 150.31$ | 450.50 | $\pm 96.90$ | 371.00 | $\pm 50.50$ | 406.50 | $\pm 18.72$ | 387.56 | $\pm 109.05$ |
|                                     | min           | 389.00  |               | 437.00 |              | 322.00 |              | 273.10 |             | 295.70 |             | 377.00 |             | 191.70 |              |
|                                     | max           | 3844.00 |               | 880.00 |              | 743.00 |              | 556.00 |             | 419.00 |             | 426.40 |             | 459.60 |              |
| DO<br>(mg/L)                        | mean $\pm$ SD | 9.25    | $\pm 2.06$    | 9.15   | $\pm 1.20$   | 9.31   | $\pm 1.45$   | 9.68   | $\pm 1.17$  | 11.29  | $\pm 1.69$  | 9.99   | $\pm 1.53$  | 9.57   | $\pm 1.06$   |
|                                     | min           | 6.39    |               | 7.45   |              | 7.38   |              | 8.19   |             | 9.88   |             | 7.45   |             | 8.61   |              |
|                                     | max           | 12.70   |               | 11.06  |              | 10.60  |              | 11.79  |             | 14.77  |             | 11.67  |             | 11.31  |              |
| COD <sub>tot</sub><br>(mg/L)        | mean $\pm$ SD | 16.46   | $\pm 16.77$   | 8.46   | $\pm 8.80$   | 18.51  | $\pm 17.86$  | 10.51  | $\pm 8.41$  | 4.80   | $\pm 9.64$  | 3.89   | $\pm 5.21$  | 5.49   | $\pm 5.45$   |
|                                     | min           | 0.00    |               | 0.00   |              | 0.00   |              | 0.00   |             | 0.00   |             | 0.00   |             | 0.00   |              |
|                                     | max           | 44.80   |               | 25.60  |              | 48.00  |              | 19.20  |             | 25.60  |             | 12.80  |             | 16.00  |              |
| BOD <sub>5</sub><br>(mg/L)          | mean $\pm$ SD | 3.61    | $\pm 4.79$    | 3.91   | $\pm 7.19$   | 3.44   | $\pm 3.43$   | 9.33   | $\pm 14.41$ | 0.77   | $\pm 1.14$  | 0.71   | $\pm 1.11$  | 2.29   | $\pm 3.95$   |
|                                     | min           | 0.00    |               | 0.00   |              | 0.00   |              | 0.00   |             | 0.00   |             | 0.00   |             | 0.00   |              |
|                                     | max           | 13.60   |               | 19.80  |              | 9.00   |              | 40.00  |             | 3.00   |             | 3.00   |             | 11.00  |              |
| SS<br>(mg/L)                        | mean $\pm$ SD | 14.33   | $\pm 10.11$   | 15.60  | $\pm 17.26$  | 32.00  | $\pm 42.60$  | 24.74  | $\pm 34.90$ | 4.07   | $\pm 2.37$  | 6.81   | $\pm 2.13$  | 3.60   | $\pm 3.03$   |
|                                     | min           | 1.50    |               | 2.50   |              | 1.00   |              | 1.00   |             | 0.50   |             | 4.50   |             | 0.67   |              |
|                                     | max           | 33.00   |               | 45.50  |              | 121.00 |              | 101.00 |             | 7.30   |             | 10.00  |             | 9.00   |              |
| Chl-a<br>( $\mu\text{g}/\text{L}$ ) | mean $\pm$ SD | 3.36    | $\pm 3.41$    | 4.01   | $\pm 4.86$   | 6.82   | $\pm 10.49$  | 3.35   | $\pm 4.82$  | 0.31   | $\pm 0.30$  | 0.26   | $\pm 0.62$  | 0.69   | $\pm 1.55$   |
|                                     | min           | 0.00    |               | 0.00   |              | 0.00   |              | 0.00   |             | 0.00   |             | 0.00   |             | 0.00   |              |
|                                     | max           | 9.85    |               | 11.27  |              | 28.81  |              | 13.06  |             | 0.89   |             | 1.36   |             | 4.00   |              |
| NO <sub>2</sub> -N<br>(mg/L)        | mean $\pm$ SD | 0.05    | $\pm 0.04$    | 0.05   | $\pm 0.03$   | 0.04   | $\pm 0.04$   | 0.04   | $\pm 0.03$  | 0.03   | $\pm 0.03$  | 0.02   | $\pm 0.02$  | 0.02   | $\pm 0.02$   |
|                                     | min           | 0.00    |               | 0.00   |              | 0.00   |              | 0.00   |             | 0.00   |             | 0.00   |             | 0.00   |              |
|                                     | max           | 0.10    |               | 0.09   |              | 0.11   |              | 0.08   |             | 0.08   |             | 0.06   |             | 0.06   |              |
| NO <sub>3</sub> -N<br>(mg/L)        | mean $\pm$ SD | 1.25    | $\pm 0.88$    | 1.40   | $\pm 0.59$   | 0.95   | $\pm 0.70$   | 2.37   | $\pm 1.50$  | 0.49   | $\pm 0.20$  | 1.37   | $\pm 2.61$  | 0.55   | $\pm 0.21$   |
|                                     | min           | 0.07    |               | 0.33   |              | 0.14   |              | 0.55   |             | 0.19   |             | 0.26   |             | 0.30   |              |

|                                  |           |         |         |        |        |       |        |       |        |       |       |       |       |       |       |
|----------------------------------|-----------|---------|---------|--------|--------|-------|--------|-------|--------|-------|-------|-------|-------|-------|-------|
|                                  | max       | 2.49    |         | 2.03   |        | 2.07  |        | 4.57  |        | 0.70  |       | 7.28  |       | 0.83  |       |
| NH <sub>4</sub> <sup>+</sup> -N  | mean ± SD | 0.35    | ±0.47   | 0.17   | ±0.21  | 0.82  | ±1.19  | 1.49  | ±3.72  | 0.62  | ±1.31 | 0.14  | ±0.16 | 0.55  | ±1.06 |
| (mg/L)                           | min       | 0.00    |         | 0.00   |        | 0.03  |        | 0.00  |        | 0.00  |       | 0.00  |       | 0.00  |       |
|                                  | max       | 1.36    |         | 0.56   |        | 3.42  |        | 9.93  |        | 3.58  |       | 0.44  |       | 2.93  |       |
| TN                               | mean ± SD | 3.35    | ±1.40   | 3.21   | ±0.76  | 3.72  | ±0.95  | 5.70  | ±2.69  | 3.04  | ±1.27 | 2.85  | ±2.70 | 2.12  | ±0.91 |
| (mg/L)                           | min       | 1.66    |         | 1.54   |        | 2.80  |        | 2.24  |        | 1.63  |       | 0.75  |       | 1.20  |       |
|                                  | max       | 5.34    |         | 3.69   |        | 5.49  |        | 10.52 |        | 4.97  |       | 8.40  |       | 3.39  |       |
| PO <sub>4</sub> <sup>3-</sup> -P | mean ± SD | 0.06    | ±0.17   | 0.02   | ±0.02  | 0.01  | ±0.02  | 0.00  | ±0.00  | 0.01  | ±0.02 | 0.01  | ±0.02 | 0.00  | ±0.00 |
| (mg/L)                           | min       | 0.00    |         | 0.00   |        | 0.00  |        | 0.00  |        | 0.00  |       | 0.00  |       | 0.00  |       |
|                                  | max       | 0.44    |         | 0.05   |        | 0.04  |        | 0.01  |        | 0.05  |       | 0.04  |       | 0.00  |       |
| F <sup>-</sup>                   | mean ± SD | 0.27    | ±0.19   | 0.25   | ±0.15  | 0.22  | ±0.12  | 0.21  | ±0.12  | 0.21  | ±0.12 | 0.21  | ±0.12 | 0.22  | ±0.15 |
| (mg/L)                           | min       | 0.05    |         | 0.07   |        | 0.09  |        | 0.08  |        | 0.10  |       | 0.10  |       | 0.08  |       |
|                                  | max       | 0.61    |         | 0.48   |        | 0.36  |        | 0.35  |        | 0.39  |       | 0.36  |       | 0.44  |       |
| Cl <sup>-</sup>                  | mean ± SD | 211.16  | ±363.10 | 47.03  | ±20.01 | 29.71 | ±13.53 | 26.26 | ±5.87  | 16.78 | ±6.02 | 14.66 | ±4.64 | 10.46 | ±1.72 |
| (mg/L)                           | min       | 18.99   |         | 19.44  |        | 16.51 |        | 15.66 |        | 12.18 |       | 11.74 |       | 7.92  |       |
|                                  | max       | 1019.44 |         | 69.85  |        | 50.15 |        | 31.70 |        | 28.37 |       | 22.44 |       | 12.87 |       |
| Br <sup>-</sup>                  | mean ± SD | 0.92    | ±1.35   | 0.32   | ±0.31  | 0.23  | ±0.36  | 0.17  | ±0.25  | 0.02  | ±0.02 | 0.02  | ±0.02 | 0.00  | ±0.01 |
| (mg/L)                           | min       | 0.00    |         | 0.09   |        | 0.00  |        | 0.03  |        | 0.00  |       | 0.00  |       | 0.00  |       |
|                                  | max       | 3.80    |         | 0.96   |        | 1.03  |        | 0.72  |        | 0.05  |       | 0.04  |       | 0.02  |       |
| SO <sub>4</sub> <sup>2-</sup>    | mean ± SD | 86.39   | ±65.08  | 65.52  | ±27.65 | 43.55 | ±21.58 | 46.57 | ±19.89 | 26.07 | ±7.76 | 23.02 | ±4.12 | 20.78 | ±5.22 |
| (mg/L)                           | min       | 28.67   |         | 30.04  |        | 25.92 |        | 23.79 |        | 19.88 |       | 19.19 |       | 11.51 |       |
|                                  | max       | 221.04  |         | 105.95 |        | 90.22 |        | 76.17 |        | 40.62 |       | 31.75 |       | 28.52 |       |
| Li <sup>+</sup>                  | mean ± SD | 0.06    | ±0.04   | 0.06   | ±0.05  | 0.05  | ±0.05  | 0.05  | ±0.05  | 0.06  | ±0.05 | 0.05  | ±0.06 | 0.05  | ±0.06 |
| (mg/L)                           | min       | 0.00    |         | 0.00   |        | 0.00  |        | 0.00  |        | 0.00  |       | 0.00  |       | 0.00  |       |
|                                  | max       | 0.11    |         | 0.11   |        | 0.11  |        | 0.11  |        | 0.11  |       | 0.11  |       | 0.11  |       |
| Na <sup>+</sup>                  | mean ± SD | 122.24  | ±205.25 | 29.73  | ±13.07 | 19.10 | ±6.06  | 19.09 | ±6.62  | 13.64 | ±1.69 | 11.25 | ±1.66 | 8.78  | ±1.63 |
| (mg/L)                           | min       | 14.77   |         | 14.92  |        | 12.19 |        | 12.28 |        | 10.18 |       | 9.31  |       | 5.96  |       |
|                                  | max       | 578.97  |         | 53.41  |        | 27.93 |        | 30.98 |        | 15.47 |       | 14.16 |       | 10.50 |       |
| K <sup>+</sup>                   | mean ± SD | 6.71    | ±7.37   | 2.91   | ±1.22  | 2.71  | ±0.52  | 2.32  | ±0.84  | 3.12  | ±0.94 | 2.37  | ±0.47 | 2.08  | ±0.48 |
| (mg/L)                           | min       | 2.08    |         | 1.86   |        | 2.11  |        | 1.66  |        | 1.70  |       | 1.76  |       | 1.25  |       |
|                                  | max       | 22.44   |         | 5.48   |        | 3.30  |        | 4.14  |        | 4.85  |       | 2.98  |       | 2.67  |       |
| Mg <sup>2+</sup>                 | mean ± SD | 30.32   | ±28.38  | 20.25  | ±7.81  | 16.76 | ±3.89  | 17.28 | ±6.97  | 7.76  | ±2.46 | 11.89 | ±3.81 | 9.86  | ±3.21 |
| (mg/L)                           | min       | 11.16   |         | 11.55  |        | 12.19 |        | 10.84 |        | 4.68  |       | 7.30  |       | 6.50  |       |
|                                  | max       | 93.14   |         | 35.95  |        | 22.06 |        | 31.42 |        | 11.30 |       | 19.33 |       | 14.51 |       |

|                            |           |       |        |       |        |       |       |       |        |       |        |       |        |       |        |
|----------------------------|-----------|-------|--------|-------|--------|-------|-------|-------|--------|-------|--------|-------|--------|-------|--------|
| Ca <sup>2+</sup><br>(mg/L) | mean ± SD | 51.38 | ±13.80 | 45.28 | ±10.28 | 50.06 | ±8.54 | 34.05 | ±12.53 | 38.40 | ±11.44 | 37.46 | ±13.78 | 48.15 | ±19.17 |
|                            | min       | 28.60 |        | 29.41 |        | 38.79 |       | 21.33 |        | 22.01 |        | 17.45 |        | 16.41 |        |
|                            | max       | 69.54 |        | 55.95 |        | 61.05 |       | 54.73 |        | 57.10 |        | 58.34 |        | 72.82 |        |

---

**Table S2b.** Physicochemical water quality parameters and pollutants in surface water (mean values  $\pm$  standard deviations, min and max values) along Lissos river for the monitoring period (June 2021- January 2023).

| Stations                     |               | 8                  | 9                  | 10                    | 11                   | 12                  |
|------------------------------|---------------|--------------------|--------------------|-----------------------|----------------------|---------------------|
| T (°C)                       | mean $\pm$ SD | 16.56 $\pm$ 8.07   | 21.04 $\pm$ 7.78   | 17.03 $\pm$ 7.61      | 12.60 $\pm$ 4.81     | 19.33 $\pm$ 5.02    |
|                              | min           | 7.10               | 11.00              | 11.00                 | 9.20                 | 13.80               |
|                              | max           | 25.10              | 28.30              | 27.50                 | 16.00                | 23.60               |
| pH                           | mean $\pm$ SD | 8.67 $\pm$ 0.32    | 8.69 $\pm$ 0.29    | 8.63 $\pm$ 0.55       | 8.27 $\pm$ 0.55      | 7.94 $\pm$ 0.06     |
|                              | min           | 8.31               | 8.35               | 8.35                  | 7.88                 | 7.88                |
|                              | max           | 9.05               | 8.98               | 9.46                  | 8.66                 | 7.99                |
| EC<br>( $\mu$ S/cm)          | mean $\pm$ SD | 290.10 $\pm$ 65.31 | 280.82 $\pm$ 64.98 | 1295.90 $\pm$ 1981.12 | 448.55 $\pm$ 248.12  | 1703.33 $\pm$ 66.58 |
|                              | min           | 229.10             | 191.70             | 180.50                | 273.10               | 1660.00             |
|                              | max           | 364.10             | 347.50             | 4260.00               | 624.00               | 1780.00             |
| DO<br>(mg/L)                 | mean $\pm$ SD | 10.23 $\pm$ 0.95   | 9.98 $\pm$ 1.04    | 9.56 $\pm$ 5.00       | 12.05 $\pm$ 2.57     | 8.56 $\pm$ 2.69     |
|                              | min           | 9.18               | 8.84               | 2.60                  | 10.23                | 6.38                |
|                              | max           | 11.65              | 11.60              | 13.89                 | 13.86                | 11.57               |
| COD <sub>tot</sub><br>(mg/L) | mean $\pm$ SD | 10.24 $\pm$ 7.64   | 11.20 $\pm$ 11.04  | 20.80 $\pm$ 20.05     | 793.60 $\pm$ 1273.27 | 17.07 $\pm$ 7.39    |
|                              | min           | 0.00               | 0.00               | 0.00                  | 32.00                | 12.80               |
|                              | max           | 19.20              | 32.00              | 40.00                 | 2688.00              | 25.60               |
| BOD <sub>5</sub><br>(mg/L)   | mean $\pm$ SD | 2.00 $\pm$ 2.35    | 2.67 $\pm$ 1.51    | 5.00 $\pm$ 1.00       | 114.35 $\pm$ 163.26  | 9.13 $\pm$ 6.31     |
|                              | min           | 0.00               | 0.00               | 4.00                  | 2.80                 | 5.00                |
|                              | max           | 5.00               | 4.00               | 6.00                  | 350.00               | 16.40               |
| SS<br>(mg/L)                 | mean $\pm$ SD | 7.20 $\pm$ 4.10    | 14.53 $\pm$ 21.66  | 52.67 $\pm$ 61.50     | 710.65 $\pm$ 1256.31 | 5.83 $\pm$ 7.52     |
|                              | min           | 3.50               | 2.00               | 9.00                  | 27.30                | 1.00                |
|                              | max           | 13.00              | 58.00              | 123.00                | 2592.31              | 14.50               |
| Chl-a<br>( $\mu$ g/L)        | mean $\pm$ SD | 0.09 $\pm$ 0.15    | 0.85 $\pm$ 1.34    | 3.42 $\pm$ 4.80       | 61.08 $\pm$ 73.89    | 4.52 $\pm$ 5.62     |
|                              | min           | 0.00               | 0.00               | 0.00                  | 2.18                 | 0.00                |
|                              | max           | 0.36               | 3.24               | 8.90                  | 156.00               | 10.81               |
| NO <sub>2</sub> -N<br>(mg/L) | mean $\pm$ SD | 0.01 $\pm$ 0.02    | 0.02 $\pm$ 0.02    | 0.04 $\pm$ 0.04       | 0.19 $\pm$ 0.07      | 0.06 $\pm$ 0.01     |
|                              | min           | 0.00               | 0.00               | 0.00                  | 0.11                 | 0.05                |
|                              | max           | 0.03               | 0.06               | 0.07                  | 0.26                 | 0.07                |
| NO <sub>3</sub> -N<br>(mg/L) | mean $\pm$ SD | 0.37 $\pm$ 0.19    | 0.35 $\pm$ 0.20    | 0.57 $\pm$ 0.88       | 2.17 $\pm$ 1.26      | 1.79 $\pm$ 1.40     |
|                              | min           | 0.11               | 0.08               | 0.05                  | 0.54                 | 0.53                |
|                              | max           | 0.63               | 0.65               | 1.58                  | 3.60                 | 3.30                |

|                                            |           |       |       |       |       |       |        |        |         |        |        |
|--------------------------------------------|-----------|-------|-------|-------|-------|-------|--------|--------|---------|--------|--------|
| NH <sub>4</sub> <sup>+</sup> -N<br>(mg/L)  | mean ± SD | 0.15  | ±0.10 | 0.15  | ±0.15 | 1.53  | ±2.45  | 13.58  | ±13.38  | 0.17   | ±0.16  |
|                                            | min       | 0.00  |       | 0.00  |       | 0.08  |        | 1.85   |         | 0.00   |        |
|                                            | max       | 0.25  |       | 0.36  |       | 4.35  |        | 25.42  |         | 0.31   |        |
| TN<br>(mg/L)                               | mean ± SD | 1.26  | ±0.37 | 2.20  | ±1.52 | 3.91  | ±1.95  | 95.14  | ±142.81 | 4.35   | ±0.15  |
|                                            | min       | 0.74  |       | 1.21  |       | 2.46  |        | 6.84   |         | 4.24   |        |
|                                            | max       | 1.76  |       | 5.19  |       | 6.13  |        | 305.95 |         | 4.52   |        |
| PO <sub>4</sub> <sup>3-</sup> -P<br>(mg/L) | mean ± SD | 0.01  | ±0.02 | 0.01  | ±0.02 | 0.00  | ±0.00  | 2.29   | ±2.14   | 0.00   | ±0.00  |
|                                            | min       | 0.00  |       | 0.00  |       | 0.00  |        | 0.38   |         | 0.00   |        |
|                                            | max       | 0.05  |       | 0.04  |       | 0.00  |        | 5.26   |         | 0.00   |        |
| F <sup>-</sup><br>(mg/L)                   | mean ± SD | 0.18  | ±0.12 | 0.25  | ±0.14 | 0.28  | ±0.12  | 0.30   | ±0.22   | 0.54   | ±0.04  |
|                                            | min       | 0.06  |       | 0.06  |       | 0.14  |        | 0.09   |         | 0.51   |        |
|                                            | max       | 0.32  |       | 0.41  |       | 0.36  |        | 0.55   |         | 0.58   |        |
| Cl <sup>-</sup><br>(mg/L)                  | mean ± SD | 11.20 | ±1.69 | 11.08 | ±2.84 | 18.59 | ±13.55 | 105.84 | ±72.92  | 227.62 | ±22.78 |
|                                            | min       | 9.41  |       | 8.76  |       | 8.89  |        | 50.20  |         | 202.50 |        |
|                                            | max       | 13.26 |       | 16.10 |       | 34.07 |        | 211.17 |         | 246.93 |        |
| Br <sup>-</sup><br>(mg/L)                  | mean ± SD | 0.18  | ±0.37 | 0.14  | ±0.31 | 0.03  | ±0.04  | 0.30   | ±0.25   | 1.51   | ±0.78  |
|                                            | min       | 0.00  |       | 0.00  |       | 0.00  |        | 0.10   |         | 1.05   |        |
|                                            | max       | 0.84  |       | 0.78  |       | 0.08  |        | 0.66   |         | 2.41   |        |
| SO <sub>4</sub> <sup>2-</sup><br>(mg/L)    | mean ± SD | 17.22 | ±3.07 | 17.58 | ±6.88 | 44.13 | ±36.63 | 67.63  | ±20.88  | 202.47 | ±9.47  |
|                                            | min       | 13.03 |       | 12.06 |       | 19.29 |        | 41.97  |         | 195.59 |        |
|                                            | max       | 20.54 |       | 30.27 |       | 86.20 |        | 87.15  |         | 213.27 |        |
| Li <sup>+</sup><br>(mg/L)                  | mean ± SD | 0.12  | ±0.19 | 0.07  | ±0.05 | 0.07  | ±0.06  | 0.06   | ±0.05   | 0.09   | ±0.04  |
|                                            | min       | 0.00  |       | 0.00  |       | 0.00  |        | 0.00   |         | 0.06   |        |
|                                            | max       | 0.46  |       | 0.11  |       | 0.11  |        | 0.11   |         | 0.13   |        |
| Na <sup>+</sup><br>(mg/L)                  | mean ± SD | 9.58  | ±1.98 | 9.27  | ±1.99 | 12.76 | ±5.71  | 78.33  | ±52.12  | 172.52 | ±10.85 |
|                                            | min       | 7.83  |       | 6.99  |       | 8.57  |        | 35.38  |         | 160.30 |        |
|                                            | max       | 12.01 |       | 11.58 |       | 19.26 |        | 150.32 |         | 181.02 |        |
| K <sup>+</sup><br>(mg/L)                   | mean ± SD | 1.67  | ±0.48 | 1.85  | ±0.81 | 2.52  | ±0.73  | 72.68  | ±69.84  | 7.07   | ±1.06  |
|                                            | min       | 1.26  |       | 1.06  |       | 1.70  |        | 8.04   |         | 5.97   |        |
|                                            | max       | 2.26  |       | 3.04  |       | 3.09  |        | 140.99 |         | 8.09   |        |
| Mg <sup>2+</sup><br>(mg/L)                 | mean ± SD | 17.51 | ±5.02 | 16.50 | ±4.80 | 8.32  | ±5.33  | 17.87  | ±13.90  | 46.50  | ±3.79  |
|                                            | min       | 11.67 |       | 9.32  |       | 4.29  |        | 7.95   |         | 43.50  |        |
|                                            | max       | 23.80 |       | 20.67 |       | 14.37 |        | 38.35  |         | 50.76  |        |
| Ca <sup>2+</sup>                           | mean ± SD | 16.54 | ±5.15 | 13.96 | ±4.03 | 31.02 | ±18.62 | 45.03  | ±17.67  | 95.97  | ±22.53 |



|        |     |       |       |       |       |        |
|--------|-----|-------|-------|-------|-------|--------|
| (mg/L) | min | 12.81 | 9.70  | 12.87 | 22.34 | 70.64  |
|        | max | 25.03 | 20.70 | 50.08 | 62.20 | 113.76 |

---

**Table S3.** Physicochemical water quality parameters and pollutants in coastal water (mean values  $\pm$  standard deviations, min and max values) along Laspia river for the monitoring period (June 2021- January 2023).

| Stations                                  |               | 1     | 2     | 3     | 4      |
|-------------------------------------------|---------------|-------|-------|-------|--------|
| T (°C)                                    | mean $\pm$ SD | 21.19 | 20.33 | 20.69 | 20.90  |
|                                           | min           | 14.10 | 13.70 | 13.50 | 13.90  |
|                                           | max           | 28.40 | 28.20 | 28.30 | 28.00  |
| pH                                        | mean $\pm$ SD | 8.28  | 8.27  | 8.31  | 8.66   |
|                                           | min           | 8.18  | 8.17  | 8.15  | 8.18   |
|                                           | max           | 8.54  | 8.43  | 8.53  | 10.56  |
| EC<br>(mS/cm)                             | mean $\pm$ SD | 45.87 | 42.98 | 45.35 | 46.00  |
|                                           | min           | 41.50 | 23.90 | 38.20 | 41.10  |
|                                           | max           | 52.90 | 52.10 | 52.30 | 50.60  |
| DO<br>(mg/L)                              | mean $\pm$ SD | 9.21  | 9.23  | 9.32  | 9.19   |
|                                           | min           | 8.05  | 8.09  | 8.33  | 8.05   |
|                                           | max           | 10.55 | 10.34 | 10.39 | 10.09  |
| BOD <sub>5</sub><br>(mg/L)                | mean $\pm$ SD | 4.00  | 2.08  | 3.42  | 6.03   |
|                                           | min           | 0.60  | 0.00  | 0.00  | 0.80   |
|                                           | max           | 6.20  | 8.70  | 10.90 | 12.90  |
| SS<br>(mg/L)                              | mean $\pm$ SD | 29.58 | 34.17 | 42.45 | 48.25  |
|                                           | min           | 17.24 | 19.12 | 18.32 | 19.00  |
|                                           | max           | 47.84 | 68.60 | 85.48 | 143.20 |
| Chl-a<br>(µg/L)                           | mean $\pm$ SD | 4.08  | 4.34  | 4.76  | 6.51   |
|                                           | min           | 1.23  | 1.12  | 0.09  | 0.62   |
|                                           | max           | 9.08  | 7.91  | 19.22 | 25.17  |
| NO <sub>2</sub> -N<br>(mg/L)              | mean $\pm$ SD | 0.20  | 0.21  | 3.52  | 0.72   |
|                                           | min           | 0.00  | 0.00  | 0.00  | 0.00   |
|                                           | max           | 0.37  | 0.40  | 20.93 | 4.04   |
| NO <sub>3</sub> -N<br>(mg/L)              | mean $\pm$ SD | 0.02  | 0.02  | 0.02  | 0.03   |
|                                           | min           | 0.00  | 0.00  | 0.00  | 0.00   |
|                                           | max           | 0.03  | 0.04  | 0.07  | 0.08   |
| NH <sub>4</sub> <sup>+</sup> -N<br>(mg/L) | mean $\pm$ SD | 0.60  | 1.33  | 4.70  | 1.57   |
|                                           | min           | 0.22  | 0.08  | 0.04  | 0.10   |
|                                           | max           | 1.47  | 3.25  | 24.33 | 8.03   |

|                                            |           |      |      |      |      |      |      |      |      |
|--------------------------------------------|-----------|------|------|------|------|------|------|------|------|
| PO <sub>4</sub> <sup>3-</sup> -P<br>(mg/L) | mean ± SD | 0.04 | 0.09 | 0.06 | 0.12 | 0.02 | 0.02 | 0.03 | 0.03 |
|                                            | min       | 0.00 |      | 0.00 |      | 0.00 |      | 0.00 |      |
|                                            | max       | 0.23 |      | 0.30 |      | 0.04 |      | 0.07 |      |

---

**Table S4.** Physicochemical water quality parameters and pollutants in coastal water (mean values  $\pm$  standard deviations, min and max values) along Lissos river for the monitoring period (June 2021- January 2023).

| Stations                                  |               | 1      |       | 2      |       | 3     |       | 4     |       |
|-------------------------------------------|---------------|--------|-------|--------|-------|-------|-------|-------|-------|
| T (°C)                                    | mean $\pm$ SD | 20.56  | 5.48  | 20.51  | 5.06  | 20.78 | 4.81  | 21.07 | 5.02  |
|                                           | min           | 13.90  |       | 14.70  |       | 14.00 |       | 14.70 |       |
|                                           | max           | 28.80  |       | 27.30  |       | 26.30 |       | 26.20 |       |
| pH                                        | mean $\pm$ SD | 8.55   | 0.77  | 8.20   | 0.09  | 8.23  | 0.15  | 8.27  | 0.14  |
|                                           | min           | 8.09   |       | 8.11   |       | 8.10  |       | 8.12  |       |
|                                           | max           | 9.91   |       | 8.31   |       | 8.45  |       | 8.43  |       |
| EC<br>(mS/cm)                             | mean $\pm$ SD | 47.17  | 3.47  | 42.37  | 9.35  | 36.19 | 13.29 | 43.00 | 9.25  |
|                                           | min           | 42.40  |       | 27.30  |       | 13.14 |       | 27.10 |       |
|                                           | max           | 50.90  |       | 51.40  |       | 49.70 |       | 50.10 |       |
| DO<br>(mg/L)                              | mean $\pm$ SD | 8.78   | 1.06  | 8.83   | 1.11  | 8.71  | 1.04  | 8.87  | 0.91  |
|                                           | min           | 7.17   |       | 7.66   |       | 7.49  |       | 8.08  |       |
|                                           | max           | 10.05  |       | 10.18  |       | 10.03 |       | 10.11 |       |
| BOD <sub>5</sub><br>(mg/L)                | mean $\pm$ SD | 4.60   | 3.15  | 3.13   | 2.51  | 2.02  | 2.82  | 2.20  | 2.14  |
|                                           | min           | 0.80   |       | 0.00   |       | 0.00  |       | 0.00  |       |
|                                           | max           | 8.40   |       | 6.70   |       | 7.30  |       | 4.80  |       |
| SS<br>(mg/L)                              | mean $\pm$ SD | 47.72  | 43.53 | 42.43  | 42.04 | 31.92 | 28.51 | 24.08 | 13.80 |
|                                           | min           | 11.40  |       | 8.88   |       | 7.92  |       | 3.15  |       |
|                                           | max           | 140.90 |       | 132.30 |       | 92.45 |       | 42.53 |       |
| Chl-a<br>(µg/L)                           | mean $\pm$ SD | 2.65   | 2.47  | 3.69   | 3.98  | 1.50  | 1.14  | 3.92  | 3.03  |
|                                           | min           | 0.33   |       | 0.58   |       | 0.21  |       | 1.40  |       |
|                                           | max           | 6.10   |       | 9.63   |       | 3.73  |       | 9.65  |       |
| NO <sub>2</sub> -N<br>(mg/L)              | mean $\pm$ SD | 0.04   | 0.03  | 0.04   | 0.03  | 0.02  | 0.02  | 0.02  | 0.03  |
|                                           | min           | 0.00   |       | 0.02   |       | 0.00  |       | 0.00  |       |
|                                           | max           | 0.11   |       | 0.11   |       | 0.05  |       | 0.07  |       |
| NO <sub>3</sub> -N<br>(mg/L)              | mean $\pm$ SD | 0.63   | 0.66  | 1.03   | 1.33  | 2.29  | 1.95  | 0.42  | 0.58  |
|                                           | min           | 0.05   |       | 0.04   |       | 0.12  |       | 0.00  |       |
|                                           | max           | 1.86   |       | 3.65   |       | 5.00  |       | 1.54  |       |
| NH <sub>4</sub> <sup>+</sup> -N<br>(mg/L) | mean $\pm$ SD | 5.57   | 8.61  | 9.36   | 21.55 | 1.29  | 1.34  | 9.72  | 22.50 |
|                                           | min           | 0.00   |       | 0.14   |       | 0.33  |       | 0.00  |       |
|                                           | max           | 21.61  |       | 58.17  |       | 3.78  |       | 55.64 |       |

|                                            |           |      |      |      |      |      |      |      |      |
|--------------------------------------------|-----------|------|------|------|------|------|------|------|------|
| PO <sub>4</sub> <sup>3-</sup> -P<br>(mg/L) | mean ± SD | 0.02 | 0.02 | 0.02 | 0.02 | 0.01 | 0.01 | 0.02 | 0.02 |
|                                            | min       | 0.00 |      | 0.00 |      | 0.00 |      | 0.00 |      |
|                                            | max       | 0.06 |      | 0.07 |      | 0.03 |      | 0.06 |      |

---
